# Supplementary material
Source: Elsevier journal article supplement (https://www.sciencedirect.com/science/article/pii/S030105461630074X)
Supplement: mmc1 [file S030105461630074X:mmc1.docx]

| **No.** | **Sex** | **Age**  **(Yrs)** | **Peanut specific IgE**  **(kU/L)** | **Walnut specific IgE**  **(kU/L)** | **Total IgE**  **(kU/L)** |
| --- | --- | --- | --- | --- | --- |
| 1 | M | 1 | 14 | 14 | 254 |
| 2 | M | 1 | 6.34 | 4.47 | 293 |
| 3 | M | 2 | 12.7 | 7.59 | 928 |
| 4 | F | 8 | 9.56 | 8.6 | 477 |
| 5 | M | 2 | 12.8 | 6.87 | 837 |
| 6 | M | 1 | 4.81 | 6.69 | 97.8 |
| 7 | F | 8 | 5.15 | 9.67 | 2188 |
| 8 | M | 2 | 14.5 | 3.66 | 72.3 |

**Supplemental Table 1.** Characteristics of both peanut and walnut immunoCAP-positive subjects
