# Supplementary material
Source: Elsevier journal article supplement (https://www.sciencedirect.com/science/article/pii/S030105461630074X)
Supplement: mmc2 [file S030105461630074X:mmc2.docx]

| **No.** | **Sex** | **Age**  **(Yrs)** | **Peanut specific IgE**  **(kU/L)** | **Soybean specific IgE**  **(kU/L)** | **Total IgE**  **(kU/L)** |
| --- | --- | --- | --- | --- | --- |
| 1 | M | 1 | 45.9 | 47.5 | 1243 |
| 2 | M | 1 | 20.5 | 47.9 | 966 |
| 3 | M | 1 | 36.1 | 46.9 | 772 |
| 4 | M | 1 | 14 | 4.69 | 254 |
| 5 | M | 1 | 3.94 | 4.08 | 1003 |
| 6 | M | 1 | 8.84 | 32.9 | 685 |
| 7 | M | 1 | 67.8 | 66.9 | 773 |
| 8 | M | 2 | 37.7 | 5.3 | 226 |
| 9 | M | 5 | 15.4 | 7.66 | 95.8 |
| 10 | M | 2 | 44.8 | 3.62 | 1696 |
| 11 | M | 2 | 17 | 29.8 | 2629 |
| 12 | M | 6 | 86 | 13.8 | >5000 |
| 13 | M | 9 | 9.31 | 22.1 | 253 |
| 14 | F | 10 | 33 | 28.3 | 728 |
| 15 | M | 1 | 26.4 | 24.4 | 2053 |
| 16 | F | 11 | 5.65 | 15.6 | 1446 |
| 17 | M | 2 | 24.5 | 26.1 | 3757 |
| 18 | M | 3 | 13.8 | 5.93 | 1767 |

**Supplemental Table 2.** Characteristics of both peanut and soybean immunoCAP-positive subjects
